# Supplementary material for: Highly selective and sensitive macrocycle-based dinuclear foldamer for fluorometric and colorimetric sensing of citrate in water
Source: PubMed Central journal article supplement (PMC5762659; doi:10.1038/s41598-017-18322-w), 2018-01-10
Supplement: 41598_2017_18322_MOESM1_ESM.pdf [file 41598_2017_18322_MOESM1_ESM.pdf]

## Supplementary Information

### Highly selective and sensitive macrocycle-based dinuclear foldamer for fluorometric and colorimetric sensing of citrate in water

Md Mhahabubur Rhaman,<sup>1</sup> Mohammad H. Hasan,<sup>2</sup> Azmain Alamgir,<sup>1</sup> Lihua Xu,<sup>3</sup> Douglas R. Powell,<sup>4</sup> Bryan M. Wong\*,<sup>3</sup> Ritesh Tandon\*<sup>2</sup> and Md. Alamgir Hossain\*<sup>1</sup>

<sup>1</sup> Department of Chemistry and Biochemistry, Jackson State University, Jackson, MS 39217, USA

<sup>2</sup> Department of Microbiology and Immunology, University of Mississippi Medical Center, Jackson, MS 39216, USA

<sup>3</sup> Department of Chemical & Environmental Engineering and Materials Science & Engineering Program, University of California-Riverside, Riverside, CA 92521, USA

<sup>4</sup> Department of Chemistry and Biochemistry, University of Oklahoma, Norman, OK 73019, USA

\*Correspondence and requests for materials should be addressed to

M. A. H. (alamgir.hossain@jsums.edu), B. M. W. (bryan.wong@ucr.edu) or R. T. (rtandon@umc.edu)

### Table of contents

|                                        | Page |
|----------------------------------------|------|
| NMR and mass spectra of <b>L</b> ..... | S2   |
| Packing diagram of <b>1'</b> .....     | S3   |
| Glutamate titration.....               | S3   |
| Phosphate titration.....               | S4   |
| Adipate titration.....                 | S4   |
| Tartrate titration.....                | S5   |
| Benzoate titration.....                | S5   |
| Acetate titration.....                 | S6   |
| Selectivity test of citrate.....       | S6   |
| Job's plot.....                        | S7   |

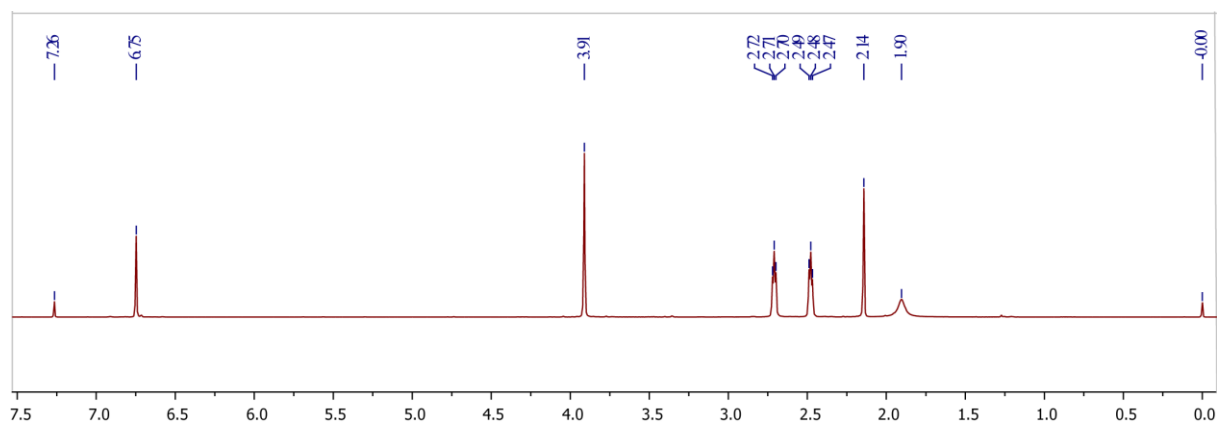

**Figure S1.**  $^1\text{H}$  NMR of **L** in  $\text{CDCl}_3$ .

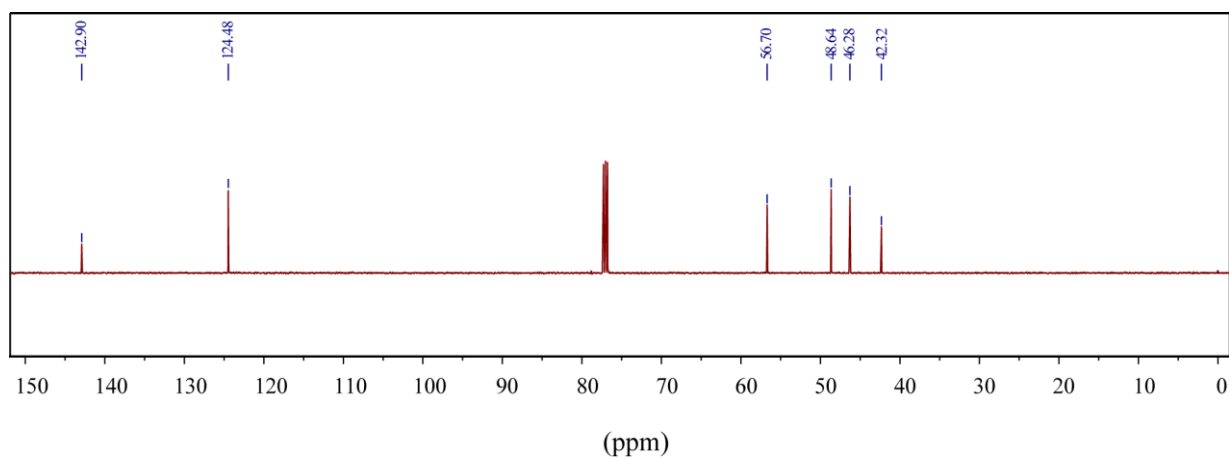

**Figure S2.**  $^{13}\text{C}$  NMR of **L** in  $\text{CDCl}_3$ .

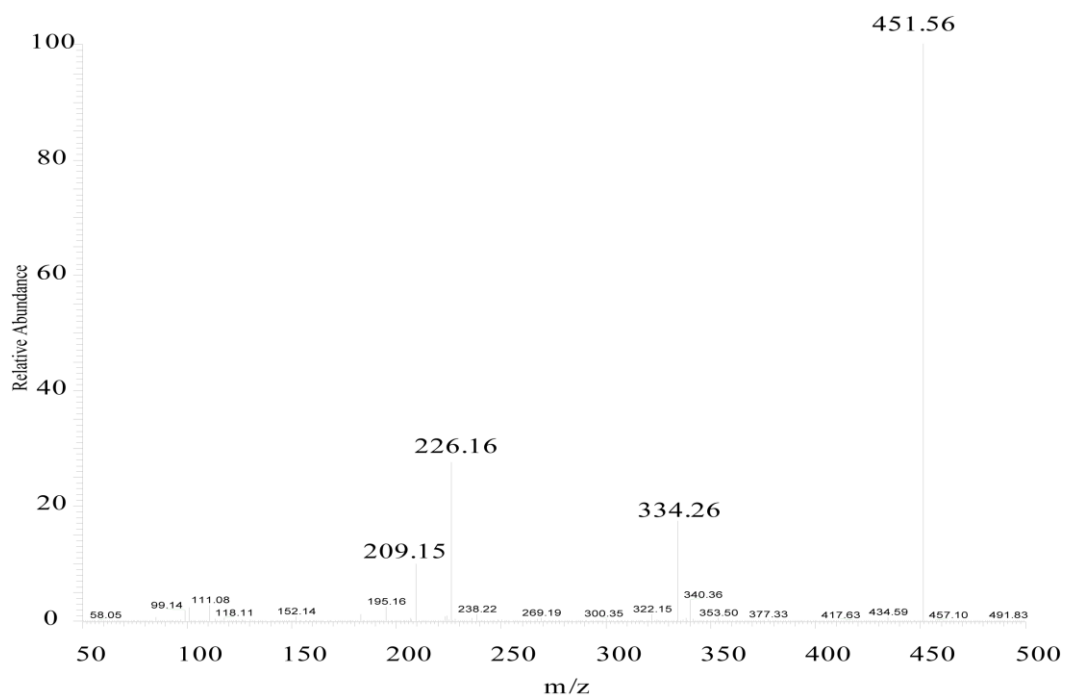

**Figure S3.** ESI-MS (+) spectra of **L**.

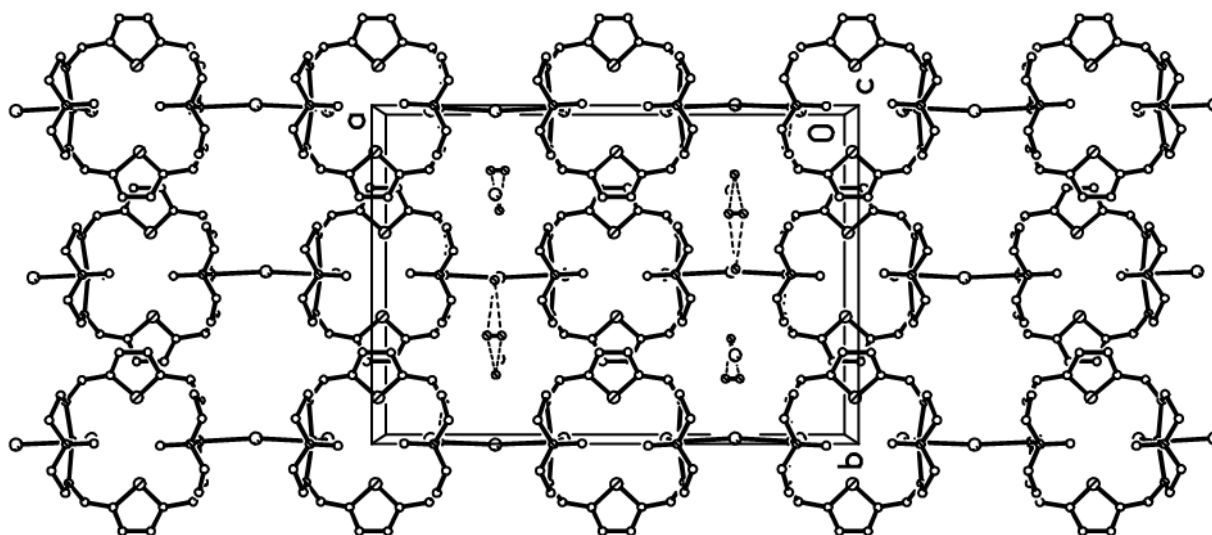

**Figure S4.** Packing diagram of **1'** showing an infinite polymer along the *a*-axis.

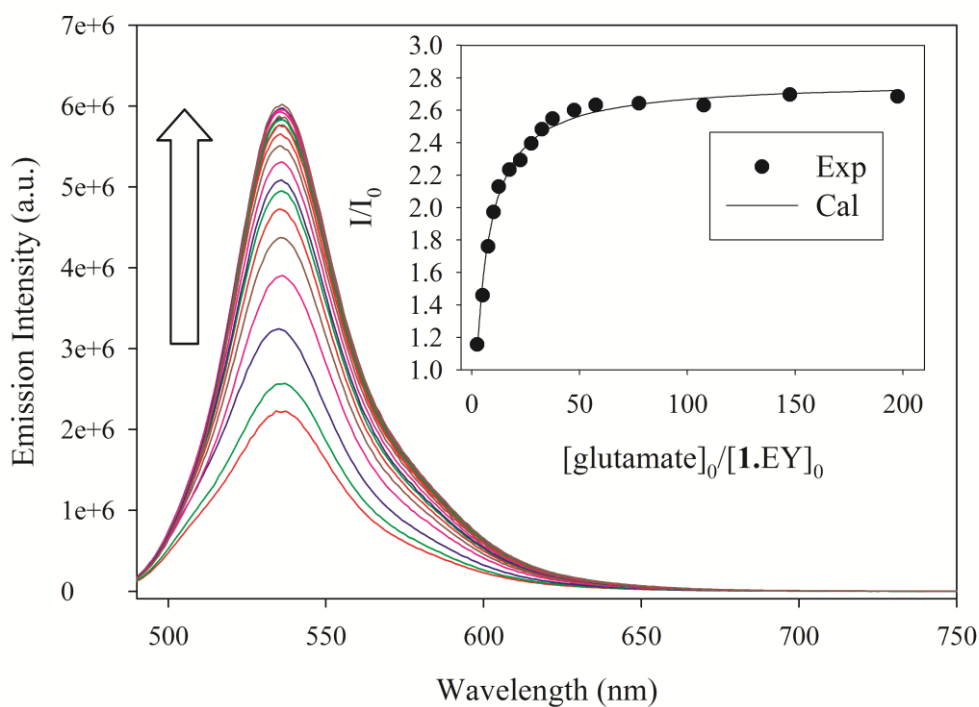

**Figure S5.** The enhancement of fluorescence intensity of [**1**·EY] (**1**/EY = 5:1) upon the addition of glutamate ( $[\mathbf{1}\cdot\text{EY}]_0 = 2 \times 10^{-6}$  M,  $[\text{glutamate}]_0 = 2 \times 10^{-3}$  M) in water buffered with 20 mM HEPES at pH 7.0.  $\lambda_{\text{ex}} = 470$  nm,  $\lambda_{\text{em}} = 536$  nm. The inset shows the titration plot of  $I/I_0$  against  $[\text{glutamate}]_0/[\mathbf{1}\cdot\text{EY}]_0$  at  $\lambda_{\text{em}} = 536$  nm.

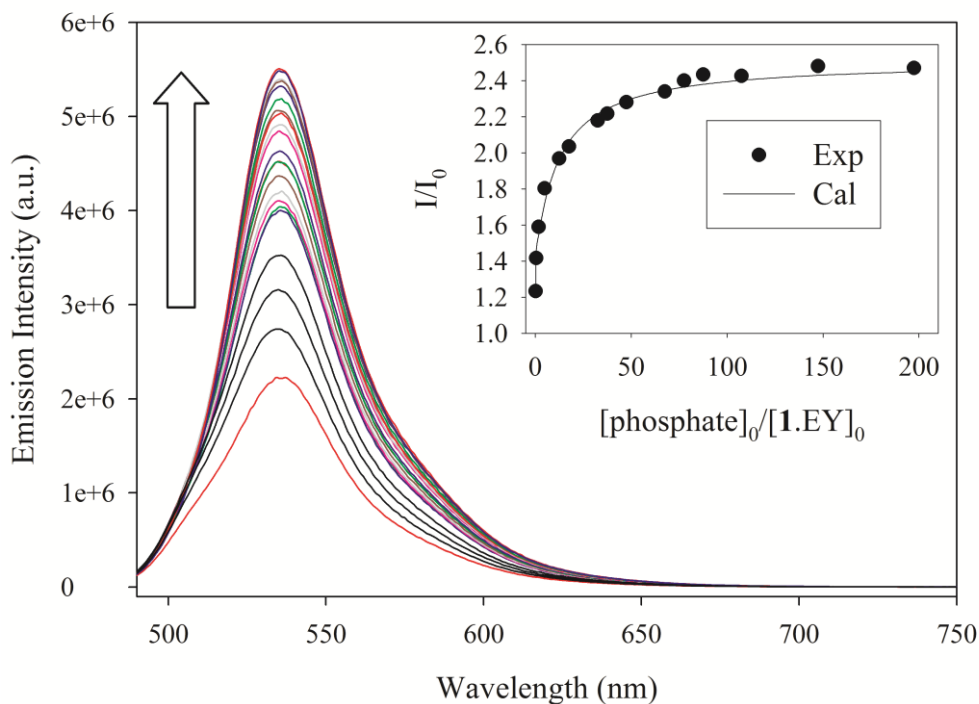

**Figure S6.** The enhancement of fluorescence intensity of [1·EY] (1/EY = 5:1) upon the addition of  $\text{K}_2\text{HPO}_4$  ( $[\mathbf{1}\cdot\text{EY}]_0 = 2 \times 10^{-6} \text{ M}$ ,  $[\text{K}_2\text{HPO}_4]_0 = 2 \times 10^{-3} \text{ M}$ ) in water buffered with 20 mM HEPES at pH 7.0.  $\lambda_{\text{ex}} = 470 \text{ nm}$ ,  $\lambda_{\text{em}} = 536 \text{ nm}$ . The inset shows the titration plot of  $I/I_0$  against  $[\text{K}_2\text{HPO}_4]_0/[\mathbf{1}\cdot\text{EY}]_0$  at  $\lambda_{\text{em}} = 536 \text{ nm}$ .

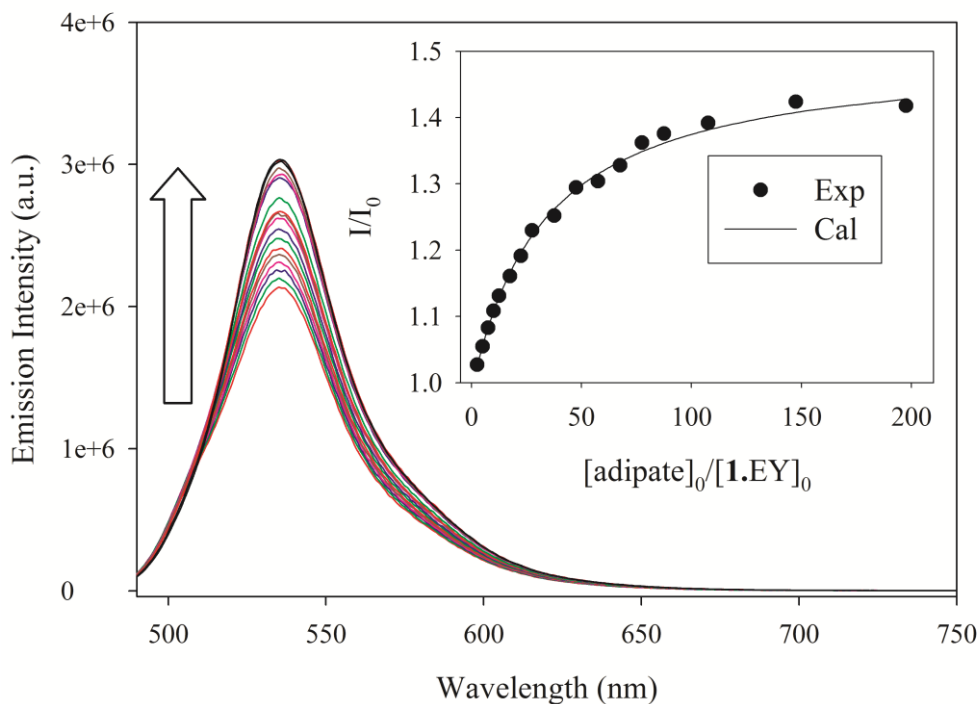

**Figure S7.** The enhancement of fluorescence intensity of [1·EY] (1/EY = 5:1) upon the addition of adipate ( $[\mathbf{1}\cdot\text{EY}]_0 = 2 \times 10^{-6} \text{ M}$ ,  $[\text{adipate}]_0 = 2 \times 10^{-3} \text{ M}$ ) in water buffered with 20 mM HEPES at pH 7.0.  $\lambda_{\text{ex}} = 470 \text{ nm}$ ,  $\lambda_{\text{em}} = 536 \text{ nm}$ . The inset shows the titration plot of  $I/I_0$  against  $[\text{adipate}]_0/[\mathbf{1}\cdot\text{EY}]_0$  at  $\lambda_{\text{em}} = 536 \text{ nm}$ .

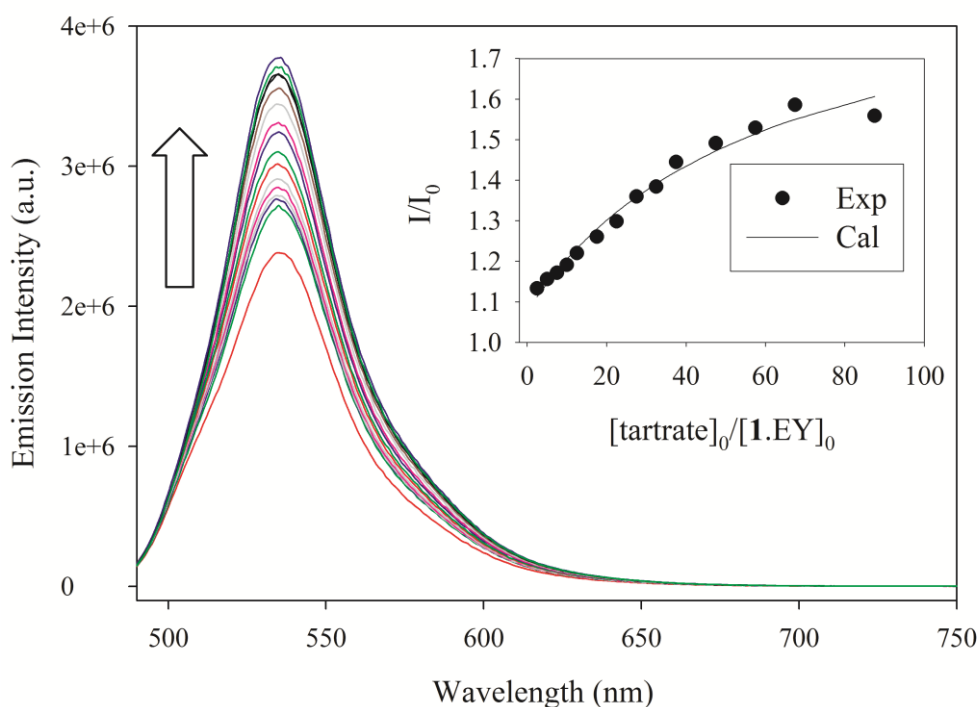

**Figure S8.** The enhancement of fluorescence intensity of  $[\mathbf{1}\cdot\text{EY}]$  ( $\mathbf{1}/\text{EY} = 5:1$ ) upon the addition of tartrate ( $[\mathbf{1}\cdot\text{EY}]_0 = 2 \times 10^{-6}$  M,  $[\text{tartrate}]_0 = 2 \times 10^{-3}$  M) in water buffered with 20 mM HEPES at pH 7.0.  $\lambda_{\text{ex}} = 470$  nm,  $\lambda_{\text{em}} = 536$  nm. The inset shows the titration plot of  $I/I_0$  against  $[\text{tartrate}]_0/[\mathbf{1}\cdot\text{EY}]_0$  at  $\lambda_{\text{em}} = 536$  nm.

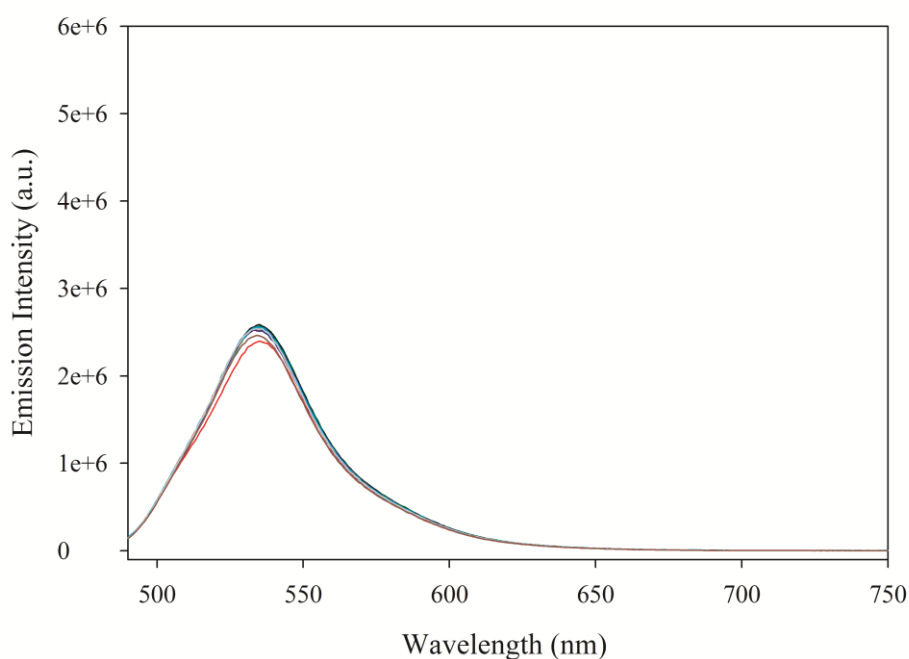

**Figure S9.** The fluorescence intensity of  $[\mathbf{1}\cdot\text{EY}]$  ( $\mathbf{1}/\text{EY} = 5:1$ ) upon the addition of benzoate ( $[\mathbf{1}\cdot\text{EY}]_0 = 2 \times 10^{-6}$  M,  $[\text{benzoate}]_0 = 2 \times 10^{-3}$  M) in water buffered with 20 mM HEPES at pH 7.0.  $\lambda_{\text{ex}} = 470$  nm,  $\lambda_{\text{em}} = 536$  nm, showing insignificant change in fluorescence intensity.

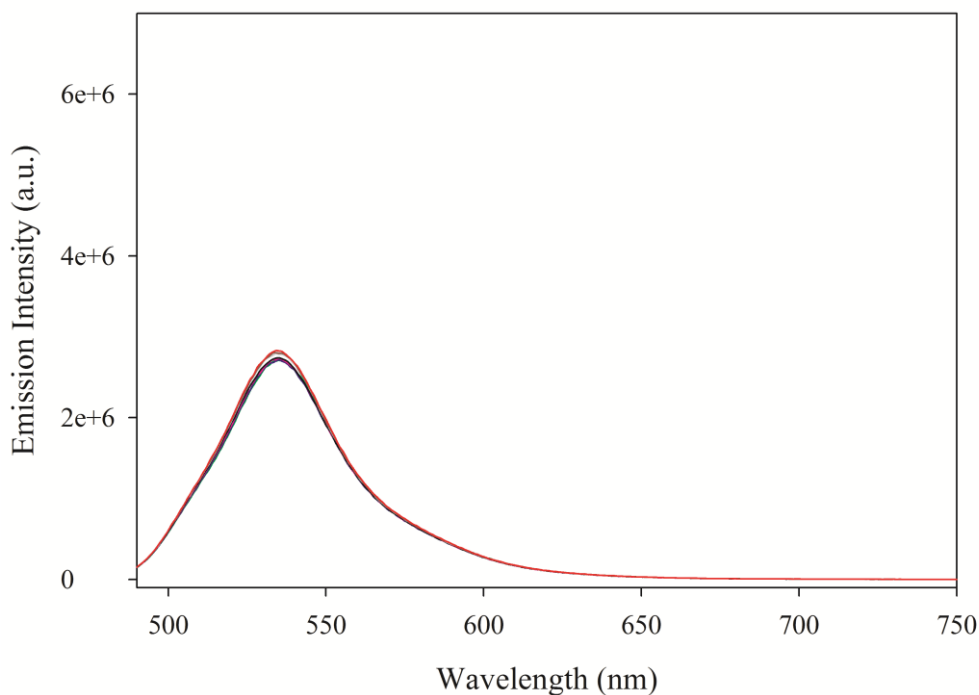

**Figure S10.** The fluorescence intensity of  $[1 \cdot EY]$  ( $1/EY = 5:1$ ) upon the addition of acetate ( $[1 \cdot EY]_0 = 2 \times 10^{-6}$  M,  $[\text{acetate}]_0 = 2 \times 10^{-3}$  M) in water buffered with 20 mM HEPES at pH 7.0.  $\lambda_{\text{ex}} = 470$  nm,  $\lambda_{\text{em}} = 536$  nm, showing insignificant change in fluorescence intensity.

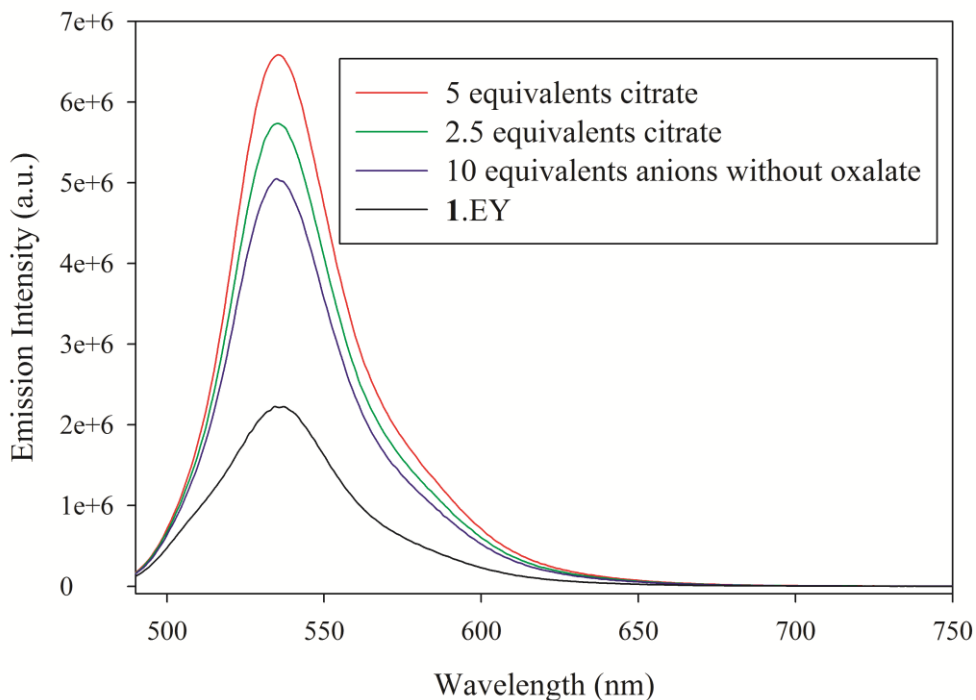

**Figure S11.** The selectivity of citrate in presence of 10 equivalents of other anions without oxalate,  $\lambda_{\text{ex}} = 470$  nm,  $\lambda_{\text{em}} = 536$  nm,  $d_{\text{ex}} = 2$ ,  $d_{\text{em}} = 3$ .

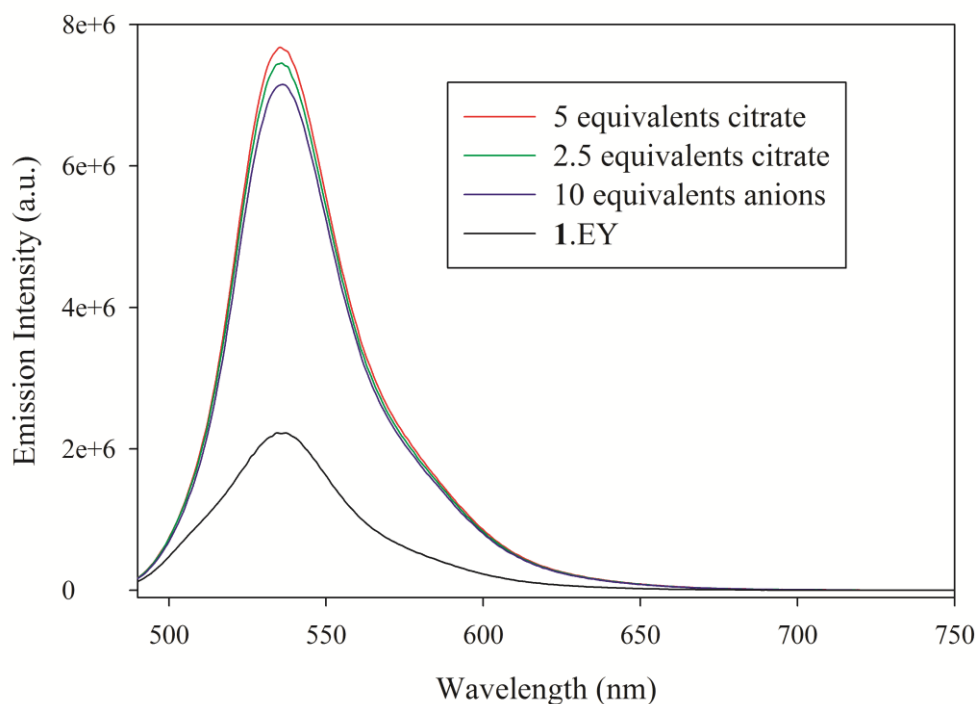

**Figure S12.** The selectivity of citrate in presence of 10 equivalents of other anions,  $\lambda_{\text{ex}} = 470 \text{ nm}$ ,  $\lambda_{\text{em}} = 536 \text{ nm}$ ,  $d_{\text{ex}} = 2$ ,  $d_{\text{em}} = 3$ .

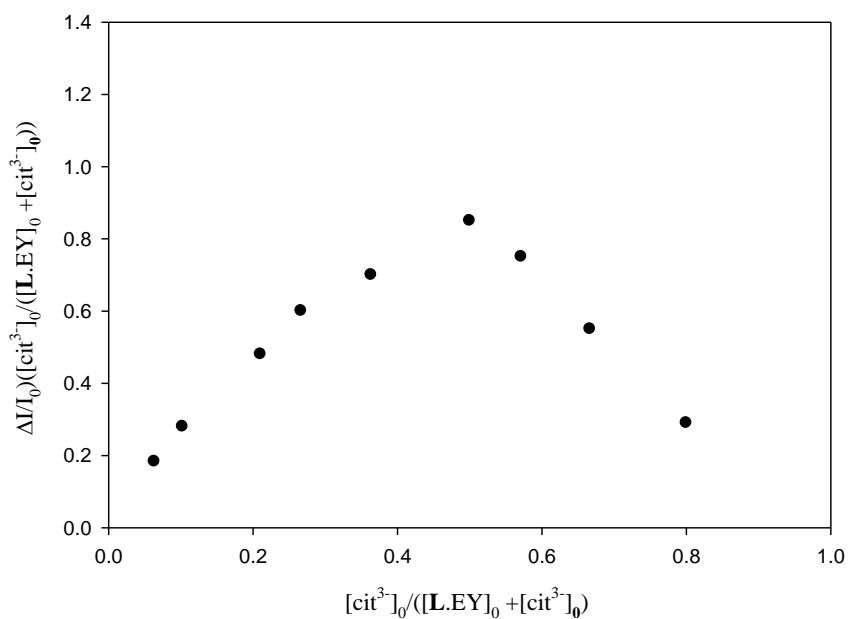

**Figure S13.** Job's plot for the formation of the citrate complex with **1.EY**. The data was obtained from the titration of **1.EY** with citrate as shown in Figure 4 in the main manuscript.
